# Supplementary material
Source: PubMed Central journal article supplement (PMC2268171)

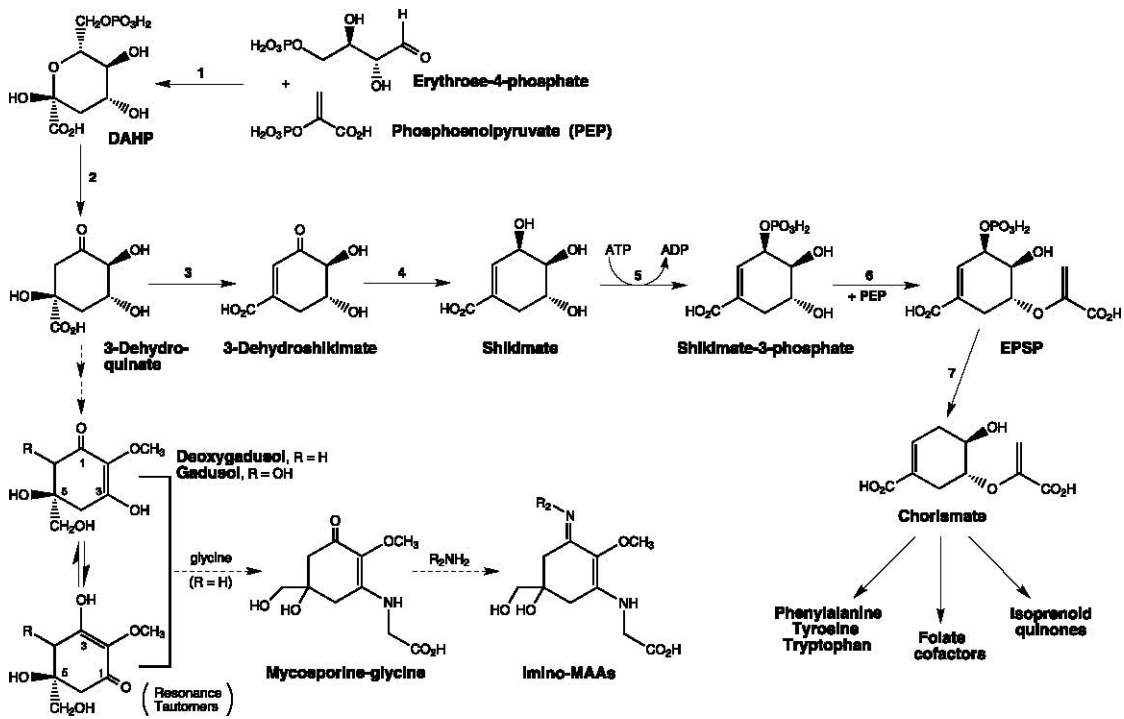

Supplement: supp_0707388105_07388Scheme1.pdf [file supp_0707388105_07388Scheme1.pdf]
